# Supplementary material for: BCEPS: A Web Server to Predict Linear B Cell Epitopes with Enhanced Immunogenicity and Cross-Reactivity
Source: MDPI journal article supplement (doi:10.3390/cells10102744), 2021-10-14
Supplement: s1 [file s1]

**Table S2:** B cell epitopes predicted in SARS-CoV-2 S protein

| <i>Start</i> | <i>Epitopes</i>                   | <i>Acces</i> | <i>Flex</i> |
|--------------|-----------------------------------|--------------|-------------|
| 202          | KIYSKHTPINLVRLPQG                 | 0,17         | 0,25        |
| 243          | ALHRSYLTPGDSSSGWTAGAAAYY          | 0,25         | -0,16       |
| 398          | DSFVIRGDEVQRQIAPGQT               | 0,17         | 0,51        |
| 400          | FVIRGDEVQRQIAPGQTGKIADYNYKLPPDFTG | 0,16         | 0,51        |
| 433          | VIAWNSNNLDSKVGGNYNLYRL            | 0,21         | 0,12        |
| 442          | DSKVGGNYNLYRLFRKS                 | 0,15         | 0,54        |
| 446          | GGNYNYLYRLFRKSNLKP                | 0,15         | 0,57        |
| 448          | NYNLYLYRLFRKSNLKPFERDISTE         | 0,16         | 0,67        |
| 456          | FRKSNLKPFERDISTEIQQA              | 0,19         | 0,99        |
| 462          | KPFERDISTEIQAGSTP                 | 0,21         | 0,91        |
| 492          | LQSYGFQPTNGVGYQPYR                | 0,16         | -0,07       |
| 556          | NKKFLPFQQFGRDIADTTD               | 0,17         | 0,07        |
| 560          | LPFQQFGRDIADTTDAVRDPQTLEILDITP    | 0,18         | 0,1         |
| 666          | IGAGICASYQTQTNSPRRARSVASQSIIAYT   | 0,27         | 0,06        |
| 773          | EQDKNTQEVFAQVKQIYKTPP             | 0,18         | 0,87        |
| 778          | TQEVFAQVKQIYKTPPIKD               | 0,15         | 0,79        |
| 807          | PDPSKPSKRSFIEDLLFNKV              | 0,19         | 0,75        |
| 1069         | PAQEKNTTAPAICHGDK                 | 0,21         | -0,03       |
| 1074         | NFTTAPAICHGDKAHFPREG              | 0,19         | -0,09       |
| 1101         | HWFVTQRNFYEPQIITTD                | 0,2          | 0,17        |
| 1156         | FKNHTSPDVLGDISGINAS               | 0,25         | 0,94        |

Table summarizes the B cell epitopes predicted by BCEPS in SARS-CoV-2 surface glycoprotein S (YP\_009724390.1). Predictions were obtained selecting a peptide size of 18 and the option to "Extend B-cell Epitopes". B cell epitopes located outside of the ectodomain or bearing n-glycosylation sites were sorted out.
