# Supplementary material for: BCEPS: A Web Server to Predict Linear B Cell Epitopes with Enhanced Immunogenicity and Cross-Reactivity
Source: MDPI journal article supplement (doi:10.3390/cells10102744), 2021-10-14
Supplement: s1 [file s1]

**Table S1:** Genetic frequency of HLA-DRB1 alleles in 4 distinct ethnic groups in USA

| HLA-DRB1   | White  | Black  | Asian  | N.A.<br>Natives | HLA-DRB1   | White  | Black  | Asian  | N. A.<br>Natives |
|------------|--------|--------|--------|-----------------|------------|--------|--------|--------|------------------|
| DRB1*01:01 | 0.085  | 0.026  | 0.0274 | 0.07            | DRB1*11:17 | 0      | 0.0002 | 0      | 0                |
| DRB1*01:02 | 0.014  | 0.0399 | 0.0003 | 0.01            | DRB1*12:01 | 0.017  | 0.0395 | 0.0289 | 0.013            |
| DRB1*01:03 | 0.009  | 0.0023 | 0.0003 | 0.01            | DRB1*12:02 | 0.0003 | 0.0027 | 0.0741 | 0                |
| DRB1*03:01 | 0.121  | 0.0707 | 0.0537 | 0.09            | DRB1*12:08 | 0      | 0      | 0.0003 | 0                |
| DRB1*03:02 | 0.001  | 0.0653 | 0      | 0.002           | DRB1*13:01 | 0.065  | 0.0555 | 0.0238 | 0.043            |
| DRB1*03:04 | 0.0001 | 0      | 0      | 0               | DRB1*13:02 | 0.043  | 0.0645 | 0.0362 | 0.038            |
| DRB1*03:05 | 0      | 0.0002 | 0      | 0               | DRB1*13:03 | 0.013  | 0.037  | 0.0003 | 0.009            |
| DRB1*03:06 | 0      | 0.0002 | 0      | 0               | DRB1*13:04 | 0.0004 | 0.0131 | 0      | 0.001            |
| DRB1*04:01 | 0.086  | 0.0229 | 0.0091 | 0.066           | DRB1*13:05 | 0.001  | 0.0004 | 0      | 0.001            |
| DRB1*04:02 | 0.011  | 0      | 0.0037 | 0.004           | DRB1*13:06 | 0.0003 | 0      | 0      | 0                |
| DRB1*04:03 | 0.008  | 0.0023 | 0.0345 | 0.011           | DRB1*13:11 | 0      | 0.0002 | 0      | 0                |
| DRB1*04:04 | 0.039  | 0.0069 | 0.0091 | 0.051           | DRB1*13:12 | 0      | 0      | 0.0042 | 0                |
| DRB1*04:05 | 0.007  | 0.0096 | 0.058  | 0.01            | DRB1*13:16 | 0      | 0.0004 | 0      | 0                |
| DRB1*04:06 | 0.001  | 0.0006 | 0.0206 | 0               | DRB1*13:20 | 0      | 0.0002 | 0      | 0                |
| DRB1*04:07 | 0.012  | 0.004  | 0.0014 | 0.049           | DRB1*13:21 | 0.0001 | 0      | 0      | 0                |
| DRB1*04:08 | 0.006  | 0.0006 | 0.0014 | 0.003           | DRB1*13:31 | 0      | 0.0006 | 0      | 0                |
| DRB1*04:09 | 0      | 0.0002 | 0      | 0               | DRB1*13:36 | 0      | 0.0002 | 0      | 0                |
| DRB1*04:10 | 0      | 0.0006 | 0.0037 | 0.002           | DRB1*13:50 | 0      | 0      | 0.0003 | 0                |
| DRB1*04:11 | 0.0003 | 0.0008 | 0      | 0               | DRB1*14:01 | 0.025  | 0.0214 | 0.024  | 0.028            |
| DRB1*04:13 | 0.0001 | 0      | 0      | 0               | DRB1*14:02 | 0.001  | 0.0006 | 0.0003 | 0.063            |
| DRB1*07:01 | 0.132  | 0.0977 | 0.082  | 0.101           | DRB1*14:03 | 0.0001 | 0      | 0.0037 | 0                |
| DRB1*07:03 | 0      | 0      | 0.0003 | 0               | DRB1*14:04 | 0.0004 | 0.0004 | 0.0204 | 0.001            |
| DRB1*08:01 | 0.025  | 0.0046 | 0.0045 | 0.016           | DRB1*14:05 | 0.0001 | 0      | 0.0175 | 0                |
| DRB1*08:02 | 0.002  | 0.001  | 0.013  | 0.016           | DRB1*14:06 | 0.001  | 0      | 0.0028 | 0.003            |
| DRB1*08:03 | 0.003  | 0.0004 | 0.0518 | 0.002           | DRB1*14:07 | 0.001  | 0      | 0.0026 | 0                |
| DRB1*08:04 | 0.002  | 0.0505 | 0      | 0.031           | DRB1*14:08 | 0      | 0      | 0.0003 | 0                |
| DRB1*08:05 | 0      | 0      | 0.0003 | 0               | DRB1*14:12 | 0      | 0      | 0.0003 | 0                |
| DRB1*08:06 | 0.0001 | 0.0052 | 0      | 0               | DRB1*14:16 | 0.0001 | 0      | 0      | 0                |
| DRB1*08:09 | 0      | 0      | 0.0023 | 0               | DRB1*14:18 | 0      | 0      | 0.0014 | 0                |
| DRB1*08:11 | 0.0003 | 0.001  | 0      | 0.007           | DRB1*14:19 | 0      | 0      | 0.0006 | 0                |
| DRB1*09:01 | 0.011  | 0.0316 | 0.1018 | 0.027           | DRB1*14:22 | 0      | 0      | 0.0003 | 0                |
| DRB1*10:01 | 0.007  | 0.0185 | 0.0311 | 0.007           | DRB1*14:25 | 0      | 0      | 0.0003 | 0                |
| DRB1*11:01 | 0.057  | 0.0871 | 0.0512 | 0.044           | DRB1*15:01 | 0.135  | 0.0293 | 0.0792 | 0.104            |
| DRB1*11:02 | 0.003  | 0.0391 | 0      | 0.004           | DRB1*15:02 | 0.008  | 0.0017 | 0.0809 | 0.005            |
| DRB1*11:03 | 0.005  | 0.0006 | 0      | 0.003           | DRB1*15:03 | 0.001  | 0.1175 | 0.0006 | 0.003            |
| DRB1*11:04 | 0.027  | 0.0056 | 0.0065 | 0.016           | DRB1*15:04 | 0      | 0      | 0.0006 | 0                |
| DRB1*11:06 | 0      | 0      | 0.0031 | 0               | DRB1*15:06 | 0.0001 | 0      | 0.004  | 0                |
| DRB1*11:08 | 0      | 0      | 0.0003 | 0               | DRB1*15:07 | 0      | 0      | 0.0003 | 0                |
| DRB1*11:10 | 0      | 0.0017 | 0      | 0               | DRB1*16:01 | 0.012  | 0.001  | 0.0003 | 0.008            |
| DRB1*11:11 | 0      | 0      | 0.0009 | 0               | DRB1*16:02 | 0.003  | 0.0154 | 0.0195 | 0.029            |

HLA-DRB1 allele frequencies were obtained from <http://www.allelefrequencies.net> (25/05/2016) and correspond to: White (USA Colorado Univ Cord Blood Bank Caucasian, sample size: 3830); Black (USA African American pop 4, sample size: 2411); Asian (USA Asian pop 2, sample size: 1772) and N. A. Natives (USA NMDP North American Native Indian, sample size: 35791).
